# Supplementary material
Source: Springer Nature journal article supplement (https://www.springermedizin.de/resource/supplementary/12865_2009_261_MOESM3_ESM.pdf/9427626)

**A**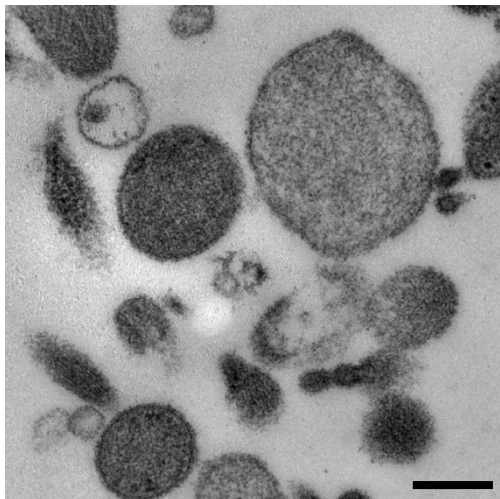**C**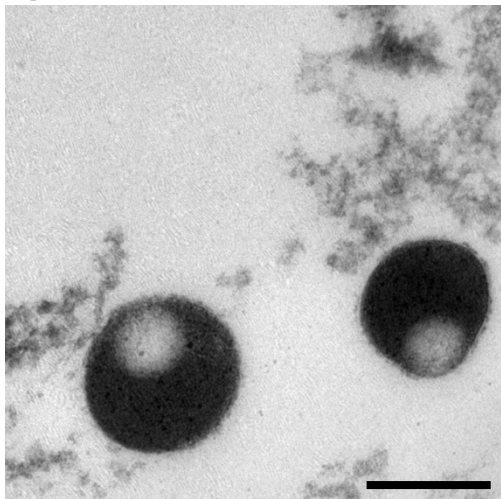**B**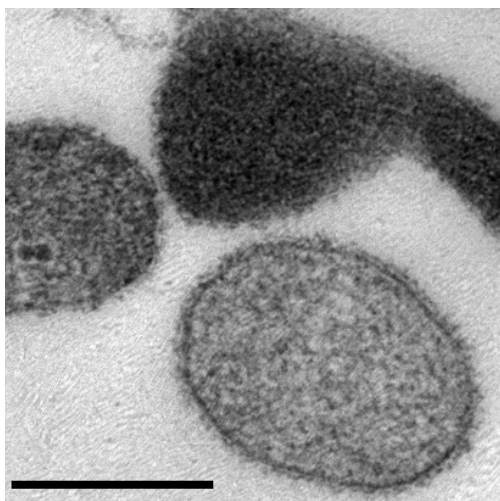**D**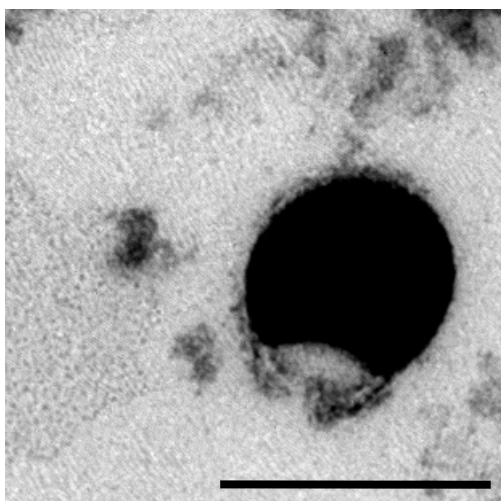

Supplement: MOESM3 [file 9427626]
